# Supplementary material
Source: PubMed Central journal article supplement (PMC2824069)
Supplement: NIHMS163375-supplement-01.pdf [file NIHMS163375-supplement-01.pdf]

Supplementary Table 1. Associations Between Paternal Age and Birth Defect Categories Without Paternal and Maternal Age Interaction Terms, Adjusted For Maternal Age Only, National Birth Defects Prevention Study 1997-2004.

| <i>Defect category</i>                 | <i>Adjusted odds ratio per year increase in paternal age*</i> | <i>95% confidence interval</i> | <i>P</i> |
|----------------------------------------|---------------------------------------------------------------|--------------------------------|----------|
| Cleft palate                           | 1.02                                                          | 1.00, 1.04                     | .015     |
| Diaphragmatic hernia <sup>†</sup>      | 1.04                                                          | 1.02, 1.06                     | <.001    |
| PVS                                    | 1.02                                                          | 1.00, 1.04                     | .028     |
| RVOTO                                  | 1.02                                                          | 1.01, 1.04                     | .007     |
| Multiple and complex defects (overall) | 1.02                                                          | 1.01, 1.03                     | <.001    |

PVS, pulmonary valve stenosis; RVOTO, right ventricular outflow tract obstruction

\*Adjusted for maternal age and maternal age<sup>2</sup>

<sup>†</sup>Cases categorized as complex (mostly Pentalogy of Cantrell) were excluded from analysis of diaphragmatic hernia

Supplementary Table 2. Associations Between Paternal Age and Birth Defect Categories With Quadratic Paternal Age Terms, Adjusted For Maternal Age Only, National Birth Defects Prevention Study 1997-2004.

| <i>Defect category</i>   | <i>Paternal age</i> | <i>Adjusted odds ratio per year increase in paternal age*</i> | <i>95% confidence interval</i> | <i>P</i> |
|--------------------------|---------------------|---------------------------------------------------------------|--------------------------------|----------|
| APVR                     | 20                  | 1.11                                                          | 1.01, 1.21                     | 0.02     |
|                          | 30                  | 1.03                                                          | 0.99, 1.07                     | 0.20     |
|                          | 40                  | 0.95                                                          | 0.88, 1.02                     | 0.18     |
| Cataract <sup>†</sup>    | 20                  | 1.10                                                          | 1.00, 1.20                     | 0.04     |
|                          | 30                  | 1.03                                                          | 0.99, 1.08                     | 0.11     |
|                          | 40                  | 0.97                                                          | 0.91, 1.04                     | 0.44     |
| Coarctation of the aorta | 20                  | 1.05                                                          | 1.00, 1.11                     | 0.05     |
|                          | 30                  | 1.02                                                          | 0.99, 1.04                     | 0.14     |
|                          | 40                  | 0.98                                                          | 0.95, 1.02                     | 0.37     |
| Encephalocele            | 20                  | 1.10                                                          | 0.99, 1.23                     | 0.08     |
|                          | 30                  | 1.02                                                          | 0.97, 1.07                     | 0.51     |
|                          | 40                  | 0.94                                                          | 0.85, 1.03                     | 0.18     |
| Esophageal atresia       | 20                  | 1.08                                                          | 1.01, 1.15                     | 0.02     |
|                          | 30                  | 1.04                                                          | 1.01, 1.07                     | 0.02     |
|                          | 40                  | 0.99                                                          | 0.96, 1.03                     | 0.72     |

APVR, anomalous pulmonary venous return; VATER/VACTERL, Vertebral, Anal, Cardiac, Tracheo-Esophageal, Renal, and Limb anomalies

\*Adjusted for maternal age and maternal age<sup>2</sup>

†Cases categorized as syndromic (due to a strong family history of congenital cataracts) were excluded from analysis of cataracts

Supplementary Table 3. Associations Between Paternal Age and Birth Defect Categories With Quadratic Paternal Age Terms, Isolated Defects Only, National Birth Defects Prevention Study 1997-2004.

| <i>Defect category</i>   | <i>Paternal age</i> | <i>Adjusted odds ratio per year increase in paternal age*</i> | <i>95% confidence interval</i> | <i>P</i> |
|--------------------------|---------------------|---------------------------------------------------------------|--------------------------------|----------|
| APVR                     | 20                  | 1.12                                                          | 1.01, 1.23                     | 0.03     |
|                          | 30                  | 1.03                                                          | 0.98, 1.07                     | 0.26     |
|                          | 40                  | 0.94                                                          | 0.87, 1.03                     | 0.17     |
| Cataract <sup>†</sup>    | 20                  | 1.11                                                          | 1.00, 1.23                     | 0.06     |
|                          | 30                  | 1.03                                                          | 0.98, 1.08                     | 0.19     |
|                          | 40                  | 0.96                                                          | 0.89, 1.04                     | 0.32     |
| Coarctation of the aorta | 20                  | 1.07                                                          | 1.01, 1.14                     | 0.02     |
|                          | 30                  | 1.03                                                          | 1.00, 1.06                     | 0.03     |
|                          | 40                  | 0.99                                                          | 0.95, 1.03                     | 0.59     |
| Encephalocele            | 20                  | 1.17                                                          | 1.01, 1.36                     | 0.04     |
|                          | 30                  | 1.03                                                          | 0.96, 1.09                     | 0.43     |
|                          | 40                  | 0.90                                                          | 0.80, 1.01                     | 0.08     |
| Esophageal atresia       | 20                  | 1.16                                                          | 1.04, 1.29                     | 0.01     |
|                          | 30                  | 1.06                                                          | 1.01, 1.11                     | 0.02     |
|                          | 40                  | 0.97                                                          | 0.91, 1.04                     | 0.40     |

APVR, anomalous pulmonary venous return; VATER/VACTERL, Vertebral, Anal, Cardiac, Tracheo-Esophageal, Renal, and Limb anomalies

\*Adjusted for maternal age, maternal age<sup>2</sup>, gravidity, periconceptional folic acid use, maternal body mass index, paternal birthplace, paternal education, paternal race and ethnicity, singleton/multiple birth, maternal smoking, maternal alcohol use, paternal drug use, use of assisted reproductive technology, and previous stillbirth or miscarriage

†Cases categorized as syndromic (due to a strong family history of congenital cataracts) were excluded from analysis of cataracts

Supplementary Table 4. Estimated Odds Ratios and 95% Confidence Intervals at Different Paternal and Maternal Ages for Defect Categories With Paternal and Maternal Age Interaction Terms, Adjusted For Maternal Age Only, National Birth Defects Prevention Study 1997-2004.

| <i>Defect category</i>     | <i>Paternal age<br/>(years)*</i> | <i>Maternal age<br/>(years)</i> | <i>Adjusted<br/>odds ratio<sup>†</sup></i> | <i>95% confidence<br/>interval</i> |
|----------------------------|----------------------------------|---------------------------------|--------------------------------------------|------------------------------------|
| Gastroschisis <sup>‡</sup> | 20                               | 20                              | 1.06                                       | 0.79, 1.42                         |
|                            | 40                               | 20                              | 0.80                                       | 0.48, 1.35                         |
|                            | 20                               | 28                              | 2.88                                       | 1.78, 4.68                         |
|                            | 40                               | 28                              | 0.82                                       | 0.57, 1.19                         |
|                            | 20                               | 35                              | 3.50                                       | 1.04, 11.71                        |
|                            | 40                               | 35                              | 0.39                                       | 0.18, 0.82                         |
| Omphalocele <sup>‡§</sup>  | 20                               | 20                              | 0.51                                       | 0.29, 0.92                         |
|                            | 40                               | 20                              | 1.35                                       | 0.78, 2.34                         |
|                            | 20                               | 28                              | 1.18                                       | 0.69, 2.02                         |
|                            | 40                               | 28                              | 0.99                                       | 0.72, 1.36                         |
|                            | 20                               | 35                              | 2.46                                       | 1.07, 5.67                         |
|                            | 40                               | 35                              | 0.76                                       | 0.51, 1.12                         |
| Spina bifida <sup>‡§</sup> | 20                               | 20                              | 0.74                                       | 0.55, 0.99                         |
|                            | 40                               | 20                              | 1.36                                       | 1.01, 1.82                         |
|                            | 20                               | 28                              | 0.97                                       | 0.79, 1.19                         |
|                            | 40                               | 28                              | 1.03                                       | 0.84, 1.27                         |
|                            | 20                               | 35                              | 0.96                                       | 0.72, 1.29                         |

|                            |    |    |      |            |
|----------------------------|----|----|------|------------|
|                            | 40 | 35 | 1.04 | 0.77, 1.39 |
| All orofacial              | 20 | 20 | 0.77 | 0.62, 0.95 |
| clefts <sup>†</sup>        | 40 | 20 | 1.03 | 0.81, 1.32 |
|                            | 20 | 28 | 0.90 | 0.72, 1.13 |
|                            | 40 | 28 | 1.09 | 0.96, 1.24 |
|                            | 20 | 35 | 1.04 | 0.71, 1.52 |
|                            | 40 | 35 | 1.15 | 0.96, 1.37 |
| Septal defect <sup>‡</sup> | 20 | 20 | 0.86 | 0.72, 1.02 |
|                            | 40 | 20 | 1.17 | 0.98, 1.39 |
|                            | 20 | 28 | 1.00 | 0.90, 1.12 |
|                            | 40 | 28 | 1.00 | 0.89, 1.12 |
|                            | 20 | 35 | 1.01 | 0.87, 1.16 |
|                            | 40 | 35 | 0.99 | 0.86, 1.14 |

\*Referent paternal age was 30 years

<sup>†</sup>Adjusted for maternal age and maternal age<sup>2</sup>

<sup>‡</sup>The following maternal and paternal age interaction terms were included in the logistic regression models for each of the defects listed: maternal age x paternal age (gastroschisis, spina bifida, omphalocele, all orofacial clefts, and all septal defects); maternal age<sup>2</sup> x paternal age (gastroschisis, spina bifida, and all septal defects); maternal age x paternal age<sup>2</sup> (gastroschisis, omphalocele, and all orofacial clefts) and maternal age<sup>2</sup> x paternal age<sup>2</sup> (gastroschisis)

§Cases categorized as complex (mostly Pentalogy of Cantrell or OEIS (Omphalocele, Exstrophy, Imperforate anus, Spinal defects)) were excluded from analyses of omphalocele and spina bifida



Supplementary Table 5. Estimated Odds Ratios and 95% Confidence Intervals at Different Paternal and Maternal Ages for Defect Categories With Paternal and Maternal Age Interaction Terms, Isolated Defects Only, National Birth Defects Prevention Study 1997-2004.

| <i>Defect category</i>     | <i>Paternal age<br/>(years)*</i> | <i>Maternal age<br/>(years)</i> | <i>Adjusted<br/>odds ratio<sup>†</sup></i> | <i>95% confidence<br/>interval</i> |
|----------------------------|----------------------------------|---------------------------------|--------------------------------------------|------------------------------------|
| Gastroschisis <sup>‡</sup> | 20                               | 20                              | 0.86                                       | 0.61, 1.20                         |
|                            | 40                               | 20                              | 0.77                                       | 0.39, 1.49                         |
|                            | 20                               | 28                              | 2.73                                       | 1.63, 4.56                         |
|                            | 40                               | 28                              | 0.80                                       | 0.53, 1.22                         |
|                            | 20                               | 35                              | 3.86                                       | 1.13, 13.17                        |
|                            | 40                               | 35                              | 0.33                                       | 0.14, 0.77                         |
| Omphalocele <sup>‡§</sup>  | 20                               | 20                              | 0.71                                       | 0.31, 1.64                         |
|                            | 40                               | 20                              | 1.36                                       | 0.66, 2.79                         |
|                            | 20                               | 28                              | 1.71                                       | 0.85, 3.42                         |
|                            | 40                               | 28                              | 0.94                                       | 0.63, 1.41                         |
|                            | 20                               | 35                              | 3.66                                       | 1.28, 10.46                        |
|                            | 40                               | 35                              | 0.68                                       | 0.42, 1.12                         |
| Spina bifida <sup>‡§</sup> | 20                               | 20                              | 0.73                                       | 0.52, 1.02                         |
|                            | 40                               | 20                              | 1.37                                       | 0.98, 1.92                         |
|                            | 20                               | 28                              | 0.94                                       | 0.75, 1.18                         |
|                            | 40                               | 28                              | 1.06                                       | 0.84, 1.34                         |
|                            | 20                               | 35                              | 1.02                                       | 0.74, 1.41                         |

|                            |    |    |      |            |
|----------------------------|----|----|------|------------|
|                            | 40 | 35 | 0.98 | 0.71, 1.35 |
| All orofacial              | 20 | 20 | 0.71 | 0.55, 0.91 |
| clefts <sup>†</sup>        | 40 | 20 | 1.11 | 0.85, 1.44 |
|                            | 20 | 28 | 0.90 | 0.70, 1.16 |
|                            | 40 | 28 | 1.11 | 0.97, 1.28 |
|                            | 20 | 35 | 1.11 | 0.73, 1.69 |
|                            | 40 | 35 | 1.12 | 0.91, 1.36 |
| Septal defect <sup>‡</sup> | 20 | 20 | 0.76 | 0.39, 1.49 |
|                            | 40 | 20 | 1.31 | 0.67, 2.55 |
|                            | 20 | 28 | 1.05 | 0.67, 1.64 |
|                            | 40 | 28 | 0.96 | 0.61, 1.50 |
|                            | 20 | 35 | 1.12 | 0.65, 1.94 |
|                            | 40 | 35 | 0.89 | 0.52, 1.53 |

\*Referent paternal age was 30 years

<sup>†</sup>Adjusted for maternal age, maternal age<sup>2</sup>, gravidity, periconceptional folic acid use, maternal body mass index, paternal birthplace, paternal education, paternal race and ethnicity, singleton/multiple birth, maternal smoking, maternal alcohol use, paternal drug use, use of assisted reproductive technology, and previous stillbirth or miscarriage

<sup>‡</sup>The following maternal and paternal age interaction terms were included in the logistic regression models for each of the defects listed: maternal age x paternal age (gastroschisis, spina bifida, omphalocele, all orofacial clefts, and all septal defects); maternal age<sup>2</sup> x paternal age (gastroschisis, spina bifida, and all septal

defects); maternal age x paternal age<sup>2</sup> (gastroschisis, omphalocele, and all orofacial clefts) and maternal age<sup>2</sup> x paternal age<sup>2</sup> (gastroschisis)

§Cases categorized as complex (mostly Pentalogy of Cantrell or OEIS (Omphalocele, Exstrophy, Imperforate anus, Spinal defects)) were excluded from analyses of omphalocele and spina bifida

Supplementary Table 5. Number and Percentage of Paternal Age, Categorized by Paternal Race and Ethnicity, National Birth Defects Prevention Study 1997-2004.

| <i>Paternal Race and Ethnicity</i> |   | <i>Paternal age</i> |       |             |         | <i>Total</i> |
|------------------------------------|---|---------------------|-------|-------------|---------|--------------|
|                                    |   | 24 and under        | 25-34 | 35 and over | Missing |              |
| NonHispanic White                  | N | 1,959               | 6,716 | 3,691       | 143     | 12,509       |
|                                    | % | 15.7%               | 53.7% | 29.5%       | 1.1%    | 100.0%       |
| NonHispanic Black                  | N | 795                 | 1,099 | 555         | 159     | 2,608        |
|                                    | % | 30.5%               | 42.1% | 21.3%       | 6.1%    | 100.0%       |
| Hispanic                           | N | 1,675               | 2,216 | 839         | 290     | 5,020        |
|                                    | % | 33.4%               | 44.1% | 16.7%       | 5.8%    | 100.0%       |
| Asian/Pacific Islander             | N | 67                  | 263   | 184         | 17      | 531          |
|                                    | % | 12.6%               | 49.5% | 34.7%       | 3.2%    | 100.0%       |
| Native American/Alaskan Native     | N | 33                  | 46    | 25          | 2       | 106          |
|                                    | % | 31.1%               | 43.4% | 23.6%       | 1.9%    | 100.0%       |
| All other races and ethnicities*   | N | 2,736               | 3,884 | 1,740       | 485     | 8,845        |
|                                    | % | 30.9%               | 43.9% | 19.7%       | 5.5%    | 100.0%       |

\*All other races and ethnicities includes all races and ethnicities other than NonHispanic White, as contained in the dichotomous variable for paternal race and ethnicity
